# Supplementary material for: Thermosensitive In Situ Gelling Poloxamers/Hyaluronic Acid Gels for Hydrocortisone Ocular Delivery
Source: MDPI journal article supplement (doi:10.3390/gels10030193), 2024-03-12
Supplement: s1 [file s1]

## Supplementary information

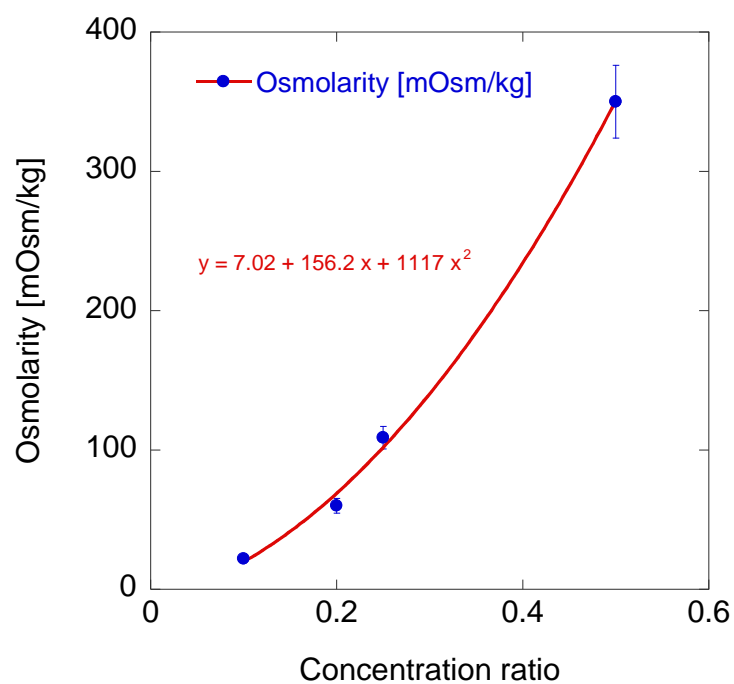

**Figure S1.** Measured values of osmolarity at 1:1, 1:4, 1:5 and 1:10 dilutions. The values are basically the same irrespective of the HA presence.

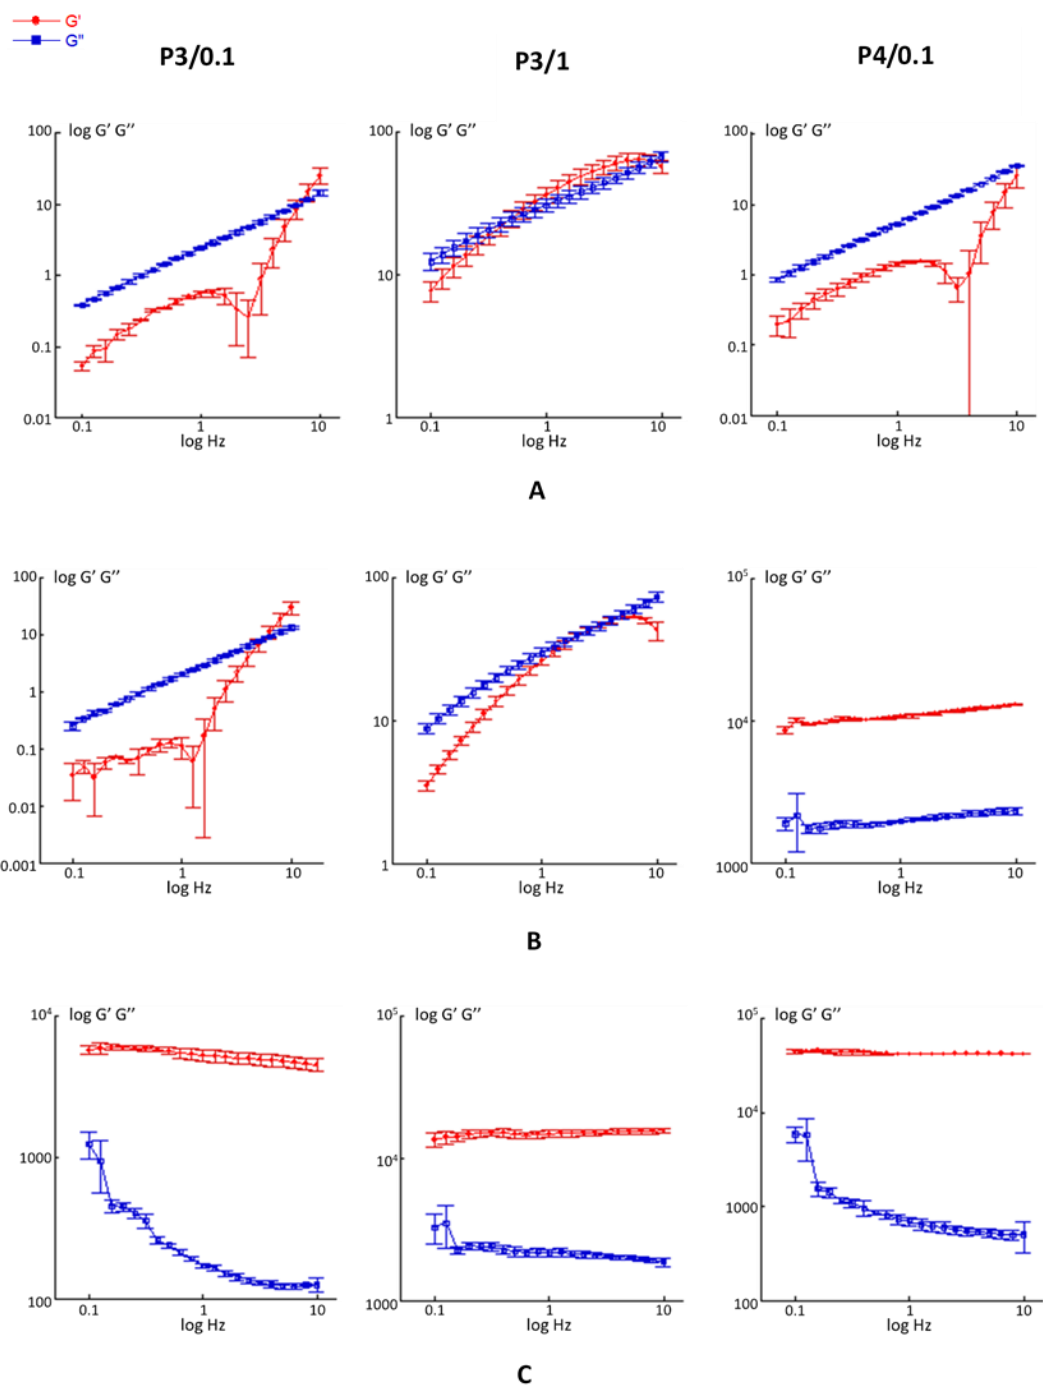

**Figure S2.** Mechanical spectra of pol/HA platforms loaded with HC at three different temperature 4 °C (A), 25°C (B) and 37°C (C).

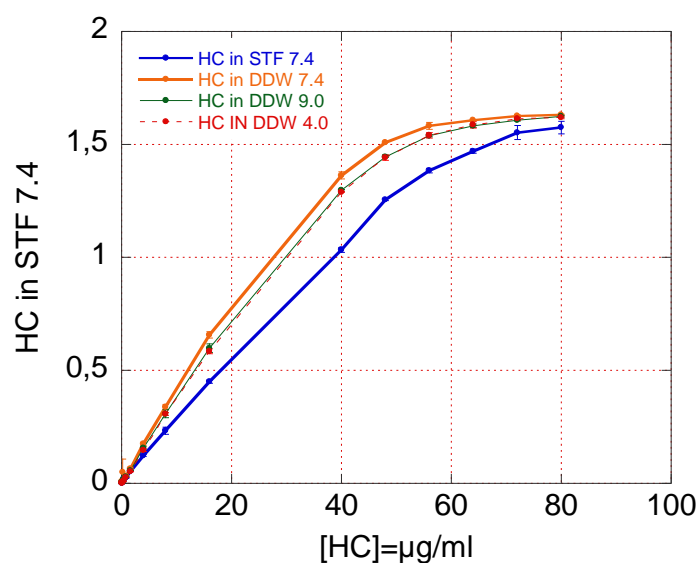

**Figure S3.** Absorbance vs. HC concentration curves at room temperature.

**Table S1.** Slopes of the calibration curves in the linear region of Figure S3.

| Calibration curves parameters |                        |                         |                        |                        |
|-------------------------------|------------------------|-------------------------|------------------------|------------------------|
|                               | STF 7.4                | pH 4.0                  | pH7.4                  | pH 9.0                 |
| Equation                      | $y = 27.993 + 0.0052x$ | $y = 37.1165x - 0.0032$ | $y = 41.287x + 0.0011$ | $y = 37.559x + 0.0006$ |
| Slope                         | 27.993                 | 37.1165                 | 41.827                 | 37.559                 |
| Standard error                | 0.004704               | 0.00677                 | 0.00543                | 0.00494                |
| R <sup>2</sup>                | 0.9993                 | 0.9992                  | 0.9996                 | 0.9996                 |
| LOD                           | 0.0005 mg/ml           | 0.0006 mg/ml            | 0.00043 mg/ml          | 0.00043 mg/ml          |
| LOQ                           | 0.00168 mg/ml          | 0.00183 mg/ml           | 0.00131 mg/ml          | 0.00132 mg/ml          |

LOD = limit of detection

LOQ= limit of quantification

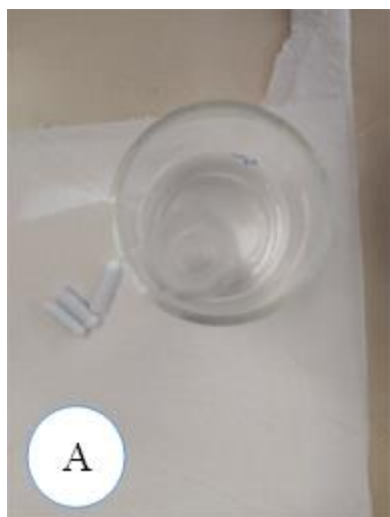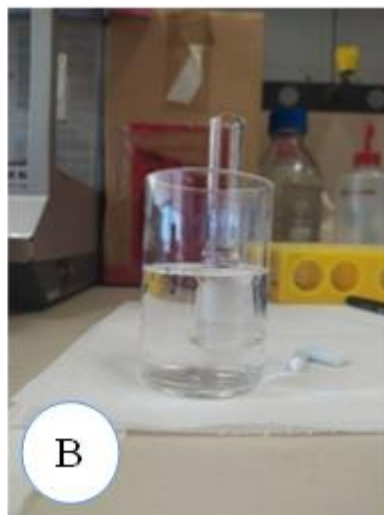

**Figure S4.** Built-in beaker specifically designed for release tests from thermosensitive hydrogels. (A) Interior of the beaker seen from above; (B) Example of a beaker containing the sample and the release medium (STF), along with the removable lid.
